# Supplementary material for: Mesoporous Composite Bioactive Compound Delivery System for Wound-Healing Processes
Source: MDPI journal article supplement (doi:10.3390/pharmaceutics15092258), 2023-08-31
Supplement: s1 [file s1]

# Mesoporous composite bioactive compound delivery system for wound healing processes

Bogdan Purcăreanu<sup>1,2</sup>, Manuela Diana Ene<sup>1</sup>, Alina Moroşan<sup>3</sup>, Dan Eduard Mihaiescu<sup>3</sup>, Mihai Alexandru Florea<sup>1</sup>, Adelina Ghica<sup>1</sup>, Roxana Andreea Niţă<sup>1</sup>, Veronica Drumea<sup>1</sup>, Mihai Alexandru Grigoroşcuţă<sup>4</sup>, Andrei Kuncser<sup>4</sup>, Petre Bădică<sup>4</sup> and Laura Olariu<sup>1,5</sup>

- <sup>1</sup> Biotehnos SA, Gorunului Street 3-5, 075100 Otopeni, Romania; bogdan.purcareanu@biotehnos.com (B.P.); diana.ene@biotehnos.com (M.D.E.); alexandru.florea@biotehnos.com (M.A.F.); adelina.bicu@biotehnos.com (A.G.); rnita@biotehnos.com (R.A.N.); veronica.drumea@biotehnos.com (V.D.); lolariu@biotehnos.com (L.O.);
- <sup>2</sup> Department of Science and Engineering of Oxide Materials and Nanomaterials, Faculty of Chemical Engineering and Biotechnologies, University POLITEHNICA of Bucharest, Gh. Polizu 1-7, 011061 Bucharest, Romania; bogdanpb89@gmail.com (B.P.)
- <sup>3</sup> Department of Organic Chemistry “Costin Neniţescu”, Faculty of Chemical Engineering and Biotechnologies, University POLITEHNICA of Bucharest, Gh. Polizu 1-7, 011061 Bucharest, Romania; alina.morosan@upb.ro (A.M.); dan.mihaiescu@upb.ro; danedmih@gmail.com (D.E.M.);
- <sup>4</sup> National Institute of Materials Physics, Street Atomistilor 405 A, 077125 Magurele, Romania; alex\_bebe07@yahoo.com (M.A.G.); akuncser@yahoo.com (A.K.); badica2003@yahoo.com (P.B.)
- <sup>5</sup> Academy of Romanian Scientists, 3 Ilfov Street, 030167 Bucharest, Romania
- \* Correspondence: dan.mihaiescu@upb.ro; danedmih@gmail.com (D.E.M.); diana.ene@biotehnos.com (M.D.E.);

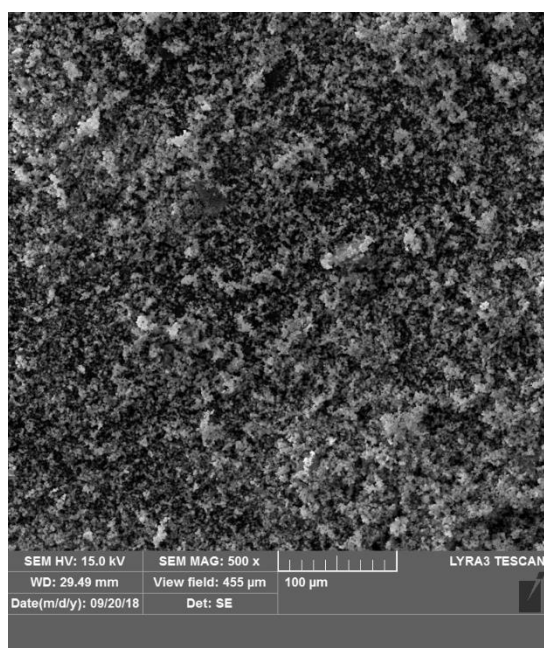

(a)

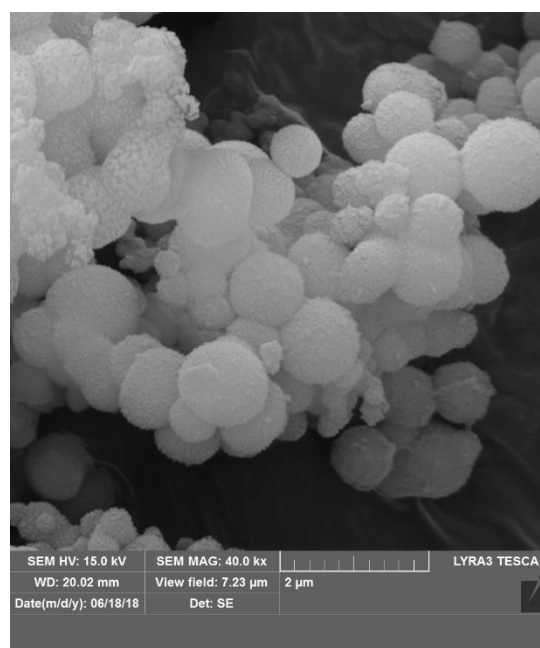

(b)

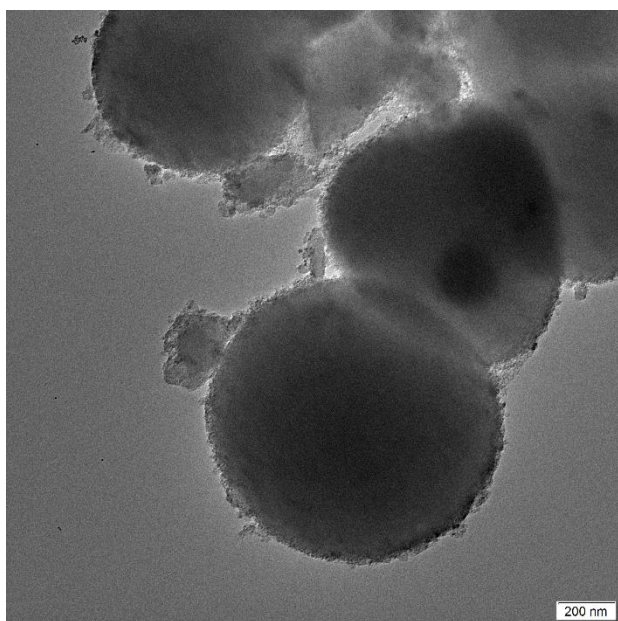

(c)

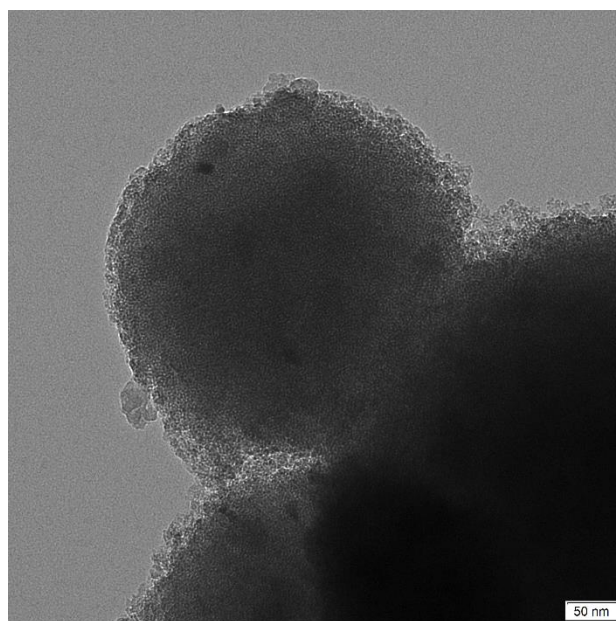

(d)

**Figure S1.** SEM images (a - b) and TEM images (c - d) at different magnifications taken on the calcined mesoporous material of type MCM-41.

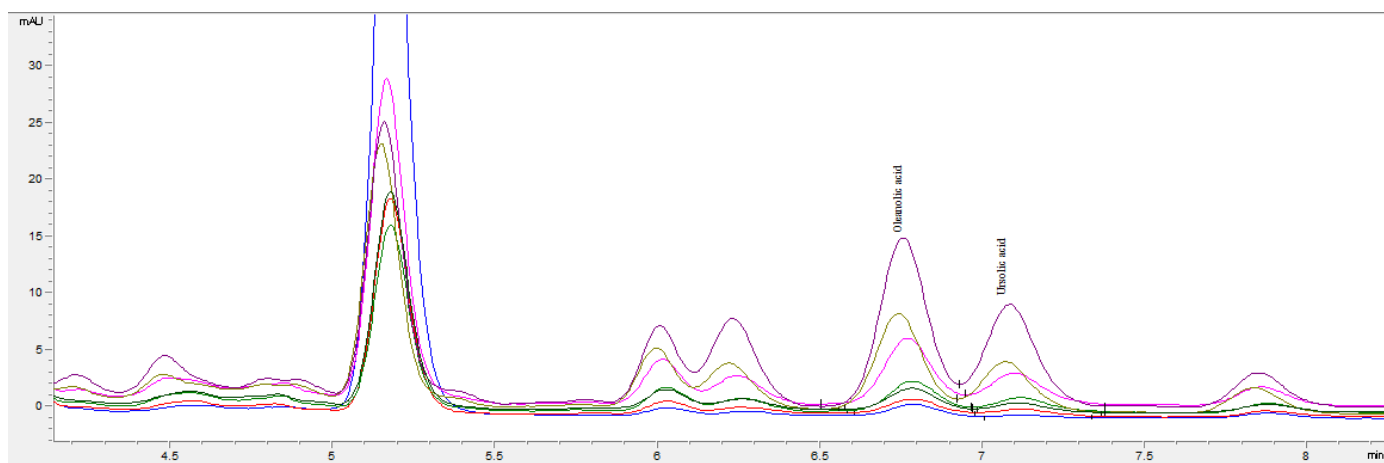

**Figure S2.** HPLC-DAD release profile chromatograms for ursolic and oleanolic acid for 12 h

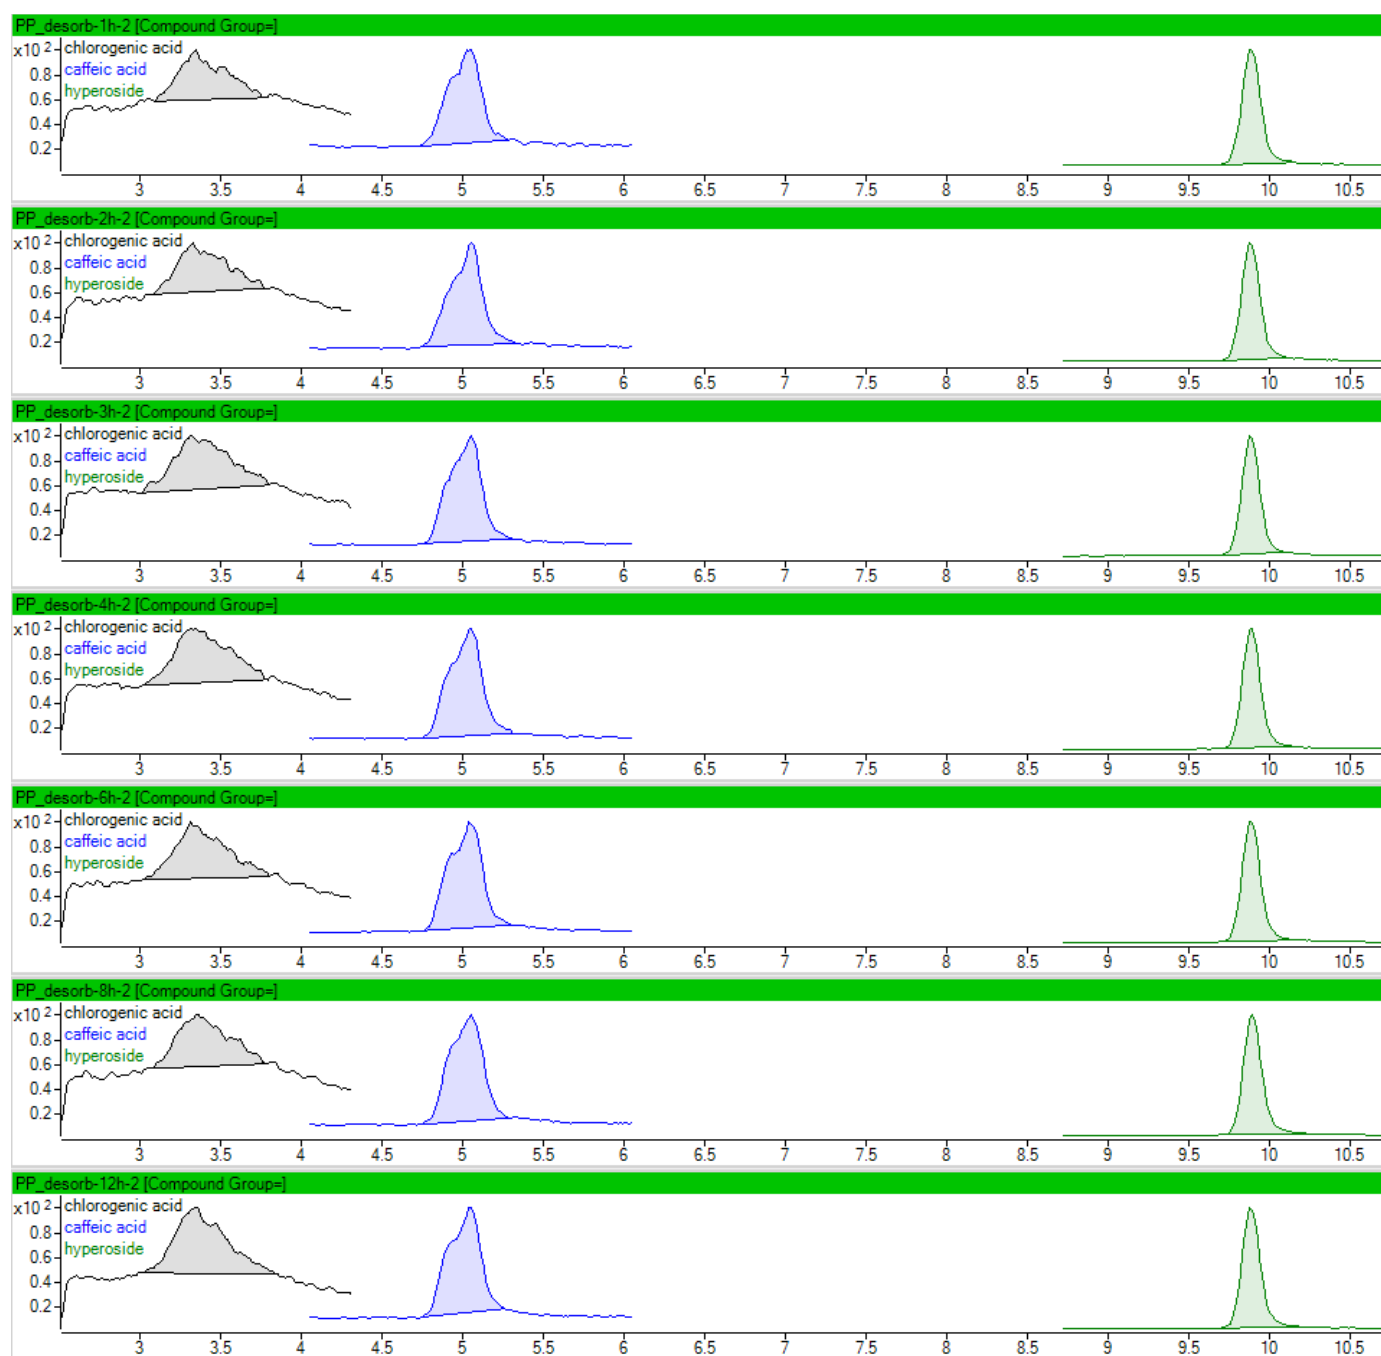

**Figure S3.** LC-MS-MS release profile chromatograms for chlorogenic acid (gray peaks), caffeic acid (blue peaks), and hyperoside (green peaks) for 12 h
